# Supplementary material
Source: MDPI journal article supplement (https://www.mdpi.com/2311-7524/8/8/752)
Supplement: s1 [file s1]

a.

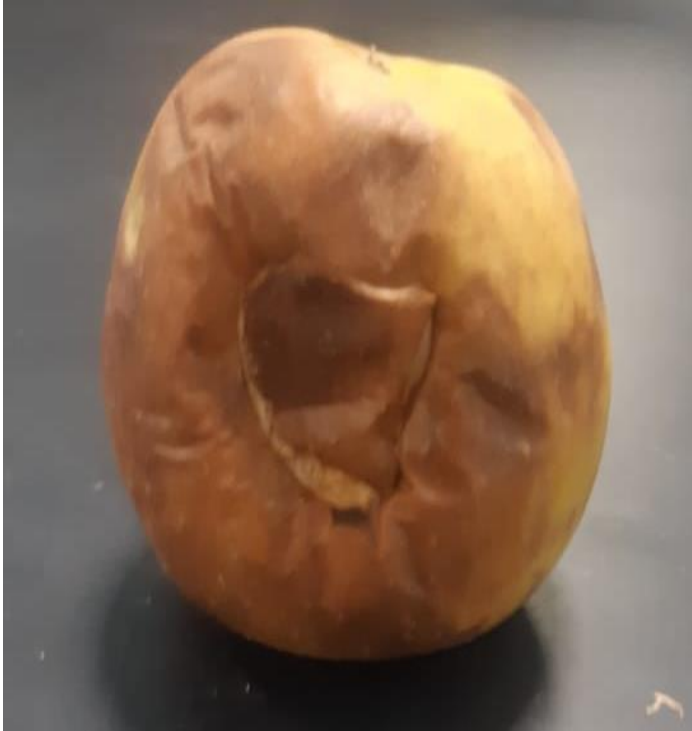

b.

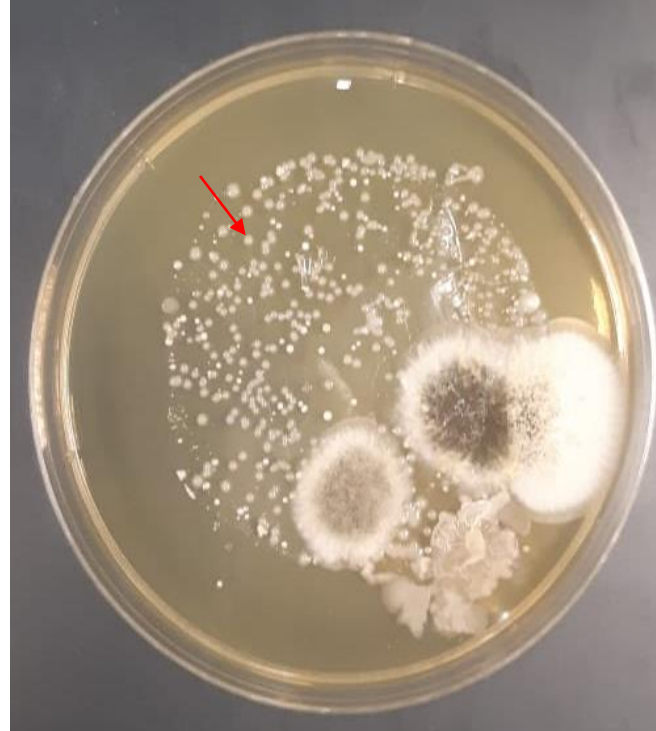

**Figure S1.** Isolation source and initial isolation, deteriorated apple fruit (a); microorganisms obtained from rotten apple (b). The red arrow indicated the most abundant bacterial isolate obtained, which was then selected for the subsequent studies.
